# Supplementary material
Source: MDPI journal article supplement (https://www.mdpi.com/1424-2818/15/1/121)

**Supplementary table S1.** List of species and 28S rDNA sequences used in this study (the second and the third datasets).

| Species                                                   | Host                              | Stage       | GenBank accession number/reference |
|-----------------------------------------------------------|-----------------------------------|-------------|------------------------------------|
| <b>Auridistomidae</b>                                     |                                   |             |                                    |
| <i>Auridistomum chelydrae</i> (Stafford, 1900)            | <i>Chelydra serpentina</i>        | Unspecified | AY116872<br>[34]                   |
| <b>Brachycladiidae</b>                                    |                                   |             |                                    |
| <i>Brachycladium goliath</i> (van Beneden, 1858)          | <i>Balaenoptera acutorostrata</i> | Marita      | KR703279<br>[81]                   |
| <i>Zalophotrema hepaticum</i> Stunkard & Alvey, 1929      | <i>Zalophus californianus</i>     | Marita      | AY222255<br>[34]                   |
| <b>Choanocotylidae</b>                                    |                                   |             |                                    |
| <i>Choanocotyle hobbsi</i> Platt and Tkach, 2003          | <i>Chelodina oblonga</i>          | Marita      | EU196356<br>[82]                   |
| <b>Collyriclidae</b>                                      |                                   |             |                                    |
| <i>Collyriclum faba</i> (Bremser in Schmalz, 1831)        | <i>Saxicola rubetra</i>           | Unspecified | JQ231122<br>[83]                   |
| <b>Eucotylidae</b>                                        |                                   |             |                                    |
| <i>Paratanaisia bragai</i> (Santos, 1934)                 | <i>Numida meleagris</i>           | Marita      | JX231098<br>[84]                   |
| <i>Tanaisia fedtschenkoi</i> Skrjabin, 1924               | <i>Anas platyrhynchos</i>         | Marita      | AY116870<br>[34]                   |
| <b>Family unknown</b>                                     |                                   |             |                                    |
| <i>Cercaria nigrospora</i> Wergun, 1957                   | Unspecified                       | Cercaria    | MK259981<br>[85]                   |
| Microphalloidea gen. sp.                                  | <i>Pila ovata</i>                 | Cercaria    | KX022508<br>Unpublished            |
| Microphalloidea gen. sp.                                  | <i>Pila ovata</i>                 | Cercaria    | KX022509<br>Unpublished            |
| <b>Faustulidae</b>                                        |                                   |             |                                    |
| <i>Antorchis pomacanthi</i> (Hafeezullah & Siddiqi, 1970) | <i>Pomacanthus semicirculatus</i> | Marita      | KR149729<br>[86]                   |
| <i>Bacciger lesteri</i> Bray, 1982                        | <i>Selenotoca multifasciata</i>   | Marita      | AY222269<br>[34]                   |
| <i>Trigonocryptus conus</i> Martin, 1958                  | <i>Arothron nigropunctatus</i>    | Marita      | AY222270                           |

|                                                                 |                                |              |                  |
|-----------------------------------------------------------------|--------------------------------|--------------|------------------|
|                                                                 |                                |              | [34]             |
| <b>Haematoloechidae</b>                                         |                                |              |                  |
| <i>Haematoloechus abbreviatus</i> (Bychowsky, 1932)             | Unspecified                    | Unspecified  | AF184251<br>[87] |
| <b>Lecithodendriidae</b>                                        |                                |              |                  |
| <i>Gyrabascus</i> sp.                                           | <i>Dromiciops bozinovici</i>   | Unspecified  | KY921598<br>[88] |
| <b>Macroderoididae</b>                                          |                                |              |                  |
| <i>Paramacroderoides echinus</i> Venard, 1941                   | <i>Lepisosteus osseus</i>      | Unspecified  | MH041375<br>[89] |
| <b>Microphallidae</b>                                           |                                |              |                  |
| <i>Levinseniella</i> sp.                                        | <i>Somateria mollissima</i>    | Marita       | MG783585<br>[15] |
| <i>Longiductotrema tethepae</i> Kudlai, Cribb & Cutmore, 2016   | <i>Grapsus albolineatus</i>    | Metacercaria | KX712084<br>[90] |
| <i>Maritrema oocysta</i> (Lebour, 1907)                         | <i>Hydrobia ulvae</i>          | Unspecified  | AY220630<br>[34] |
| <i>Maritrema subdolum</i> Jägerskiöld, 1909                     | Unspecified                    | Marita       | AF151926<br>[91] |
| <i>Microphallus abortivus</i> Deblock, 1974                     | <i>Hydrobia ulvae</i>          | Unspecified  | AY220626<br>[92] |
| <i>Microphallus ochotensis</i> Galaktionov & Blasco-Costa, 2018 | <i>Falsicingula kurilensis</i> | Metacercaria | MG783588<br>[15] |
| <i>Microphallus piriformes</i> Galaktionov, 1983                | <i>Littorina saxatilis</i>     | Sporocyst    | HM584122<br>[56] |
| <i>Microphallus pygmaeus</i> (Levinsen, 1881)                   | <i>Littorina saxatilis</i>     | Sporocyst    | HM584133<br>[56] |
| <i>Microphallus similis</i> (Jägerskiöld, 1900)                 | <i>Carcinus maenas</i>         | Metacercaria | AY220625<br>[92] |
| <b>Omphalometridae</b>                                          |                                |              |                  |
| <i>Omphalometra flexuosa</i> (Rudolphi, 1809)                   | <i>Planorbis planorbis</i>     | Unspecified  | AF300333<br>[93] |
| <b>Pachypsolidae</b>                                            |                                |              |                  |
| <i>Pachypsolus irroratus</i> (Rudolphi, 1819)                   | <i>Lepidochelys olivacea</i>   | Marita       | AY222274<br>[34] |
| <b>Plagiorchiidae</b>                                           |                                |              |                  |
| <i>Choledocystus hepaticus</i> (Lutz, 1928)                     | <i>Bufo marinus</i>            | Marita       | AY875679<br>[94] |

|                                                                                                               |                                  |              |                         |
|---------------------------------------------------------------------------------------------------------------|----------------------------------|--------------|-------------------------|
| <i>Dolichosaccus rastellus</i> (Olsson, 1876) (= <i>Lecithopyge rastellus</i> )                               | Unspecified                      | Marita       | AF151932<br>[91]        |
| <i>Neoglyphe sobolevi</i> (Shaldybin, 1953)                                                                   | <i>Sorex araneus</i>             | Marita       | AF300329<br>[93]        |
| <i>Plagiorchis elegans</i> (Rudolphi, 1802)                                                                   | <i>Austrolittorina antipodum</i> | Cercaria     | KJ533393<br>[95]        |
| <b>Pleurogenidae</b>                                                                                          |                                  |              |                         |
| <i>Allassogonoporus amphoraeformis</i> (Mödlinger, 1930)                                                      | <i>Pipistrellus kuhli</i>        |              | AF151924<br>[91]        |
| <i>Collyricloides massanae</i> Vaucher, 1969                                                                  | <i>Erithacus rubecula</i>        | Unspecified  | KP682451<br>[96]        |
| <i>Parabascus duboisi</i> (Hurkova, 1961)                                                                     | <i>Myotis daubentoni</i>         | Unspecified  | AY220618<br>[92]        |
| <b>Prosthogonimidae</b>                                                                                       |                                  |              |                         |
| <i>Prosthogonimus cuneatus</i> (Rudolphi, 1809)                                                               | <i>Sturnus vulgaris</i>          | Marita       | AY220634<br>[92]        |
| <i>Schistogonimus rarus</i> (Braun, 1901)                                                                     | <i>Anas querquedula</i>          | Marita       | AY116869<br>[92]        |
| <b>Reniferidae</b>                                                                                            |                                  |              |                         |
| <i>Lechriorchis tygarti</i> Talbot, 1934                                                                      | <i>Lithobates sylvaticus</i>     | Metacercaria | JF820601<br>[97]        |
| <b>Renicolidae</b>                                                                                            |                                  |              |                         |
| <i>Renicola</i> sp.                                                                                           | <i>Austrolittorina antipodum</i> | Cercaria     | KJ868215<br>[98]        |
| <i>Renicola</i> sp.                                                                                           | <i>Numenius arquata</i>          | Marita       | AY116871<br>[34]        |
| <b>Zoogonidae</b>                                                                                             |                                  |              |                         |
| <i>Deretrema nahaense</i> Yamaguti, 1942                                                                      | <i>Thalassoma lunare</i>         | Marita       | AY222273<br>[34]        |
| <i>Diptherostomum</i> sp.                                                                                     | <i>Scolopsis monogramma</i>      | Marita       | AY222272<br>[34]        |
| <i>Lecithostaphylus brayi</i> Cabañas-Granillo, Solórzano-García, Mendoza-Garfias & Pérez-Ponce de León, 2020 | <i>Tylosurus pacificus</i>       | Marita       | MT704138<br>[99]        |
| <i>Lecithostaphylus halongi</i> Atopkin, Besprozvannykh, Ha, Nguyen & Nguyen, 2022                            | Unspecified                      | Marita       | OK636407<br>[40]        |
| <i>Lepidophyllum cameroni</i> Arai, 1969                                                                      | <i>Gymnocanthus detrisus</i>     | Marita       | MN217108<br>Unpublished |
| <i>Lepidophyllum steenstrupi</i> Odhner, 1902                                                                 | <i>Anarhichas lupus</i>          | Marita       | AY157175<br>[100]       |

|                                                                 |                               |              |                        |
|-----------------------------------------------------------------|-------------------------------|--------------|------------------------|
| <i>Proctophantastes gillissi</i> (Overstreet & Pritchard, 1977) | <i>Muraenolepis marmorata</i> | Marita       | KU163452<br>[38]       |
| <i>Pseudozoogonoides subaequiporus</i> (Odhner, 1911)           | <i>Anarhichas lupus</i>       | Marita       | OP956068<br>This study |
| <i>Steganoderma</i> cf. <i>eamiqtrema</i> Blend and Racz, 2020  | <i>Chionoecetes bairdi</i>    | Metacercaria | MW264135<br>[39]       |
| <i>Zoogonoides viviparus</i> (Olsson, 1868) Odhner, 1902        | <i>Callionymus lyra</i>       | Marita       | AY222271<br>[34]       |
| <b>Urotrematidae</b>                                            |                               |              |                        |
| <i>Urotrema scabridum</i> Braun, 1900                           | <i>Eptesicus innoxius</i>     | Unspecified  | MK477545<br>[101]      |

**Supplementary Figure S1.** Analysis of the second dataset. Phylogenetic position of *Pseudozoogonoides subaequiporus* (indicated bold) based on 28S rDNA sequence data analysis inferred with Bayesian inference (BI) and maximum likelihood (ML). Nodal support: ML/BI. Scale bar shows the substitution rate. Model of nucleotide substitution: GTR+G+I.

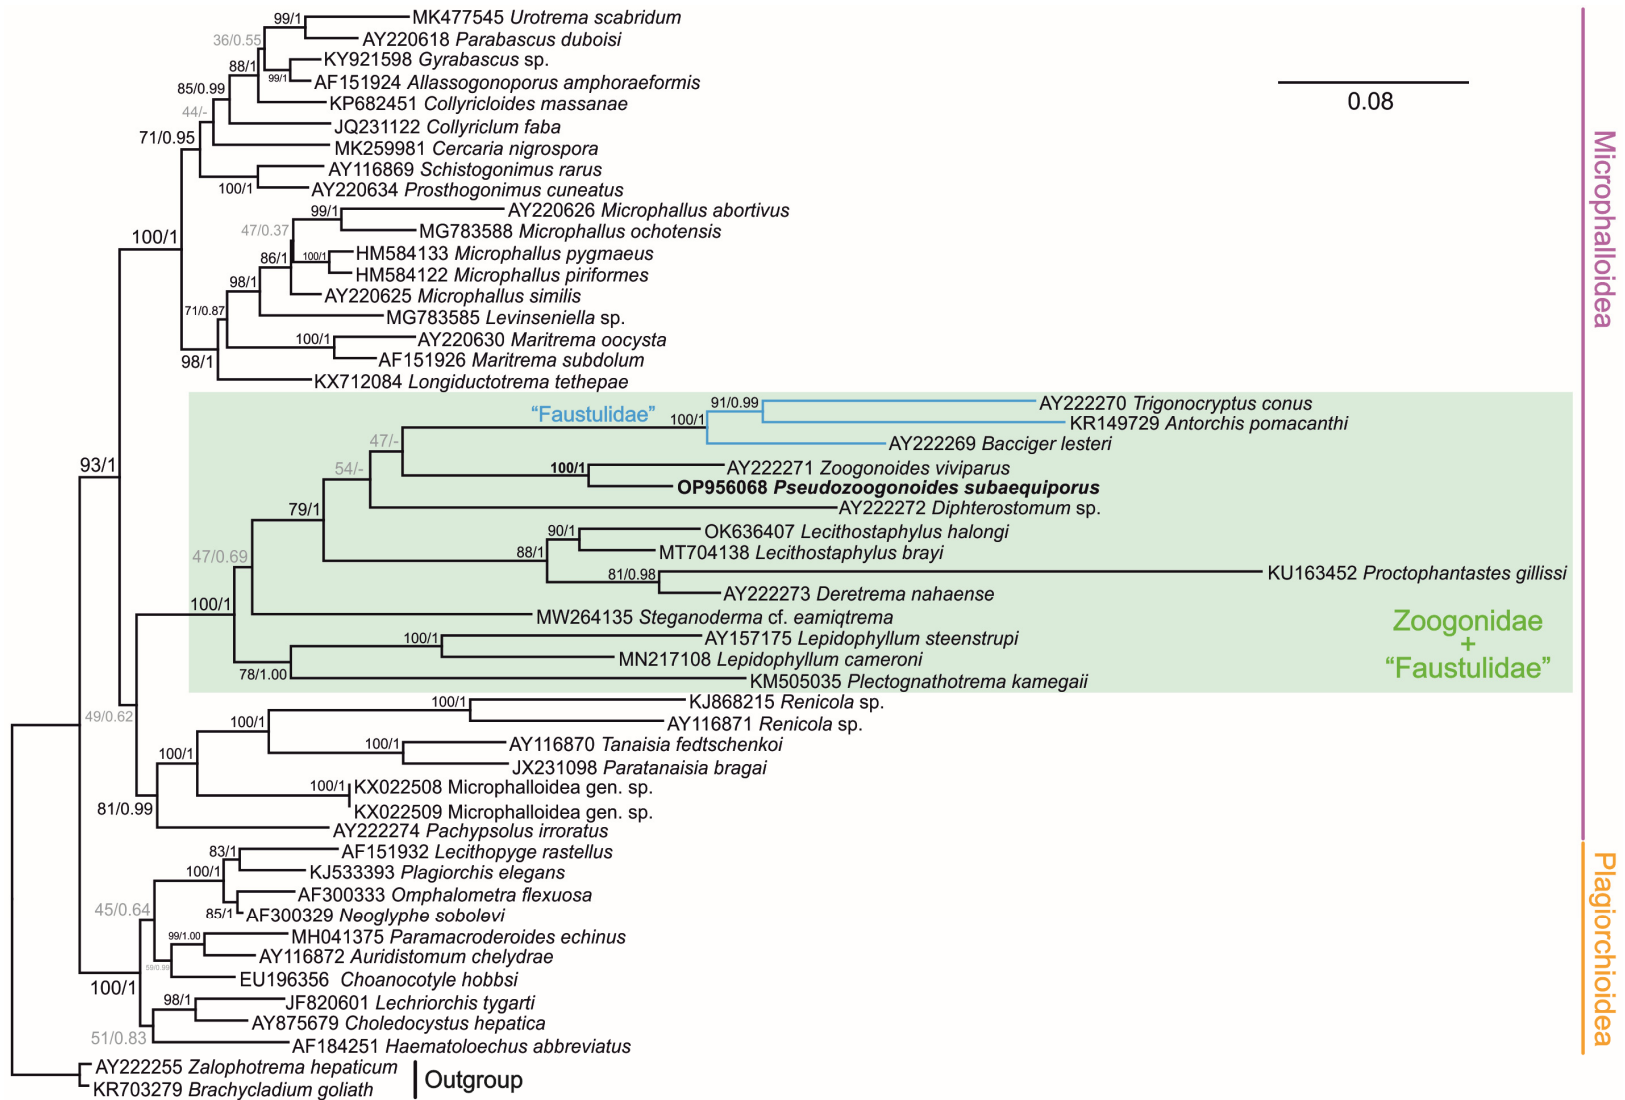

Supplement: s1 [file s1]
